# Supplementary material for: Turnover of aberrant pre-40S pre-ribosomal particles is initiated by a novel endonucleolytic decay pathway
Source: PubMed Central journal article supplement — Nucleic Acids Res. 2018 Feb 22;46(9):4699–714. doi: 10.1093/nar/gky116 (PMC5961177; doi:10.1093/nar/gky116), 2018-02-22
Supplement: gky116_supp.pdf [file gky116_supp.pdf]

| ORF      | Gene   | AC     | ID           | MW      | Description                                   | Bestscore | Peptides | Sequences | Coverage(%) | Total |
|----------|--------|--------|--------------|---------|-----------------------------------------------|-----------|----------|-----------|-------------|-------|
| YGR271CA | EFG1   | A6ZUS8 | EFG1P_YEAS7  | 27161,6 | rRNA-processing protein EFG1                  | 654,38    | 21       | 17        | 69,1        | 36    |
| YLR197W  | NOP56  | Q12460 | NOP56_YEAST  | 57057   | Nucleolar protein 56                          | 693,3     | 20       | 20        | 50,2        | 30    |
| YLL045C  | RPL8B  | P29453 | RL8B_YEAST   | 28151,4 | 60S ribosomal protein L8-B                    | 414,73    | 19       | 19        | 57,4        | 31    |
| YDL014W  | NOP1   | P15646 | FBRL_YEAST   | 34615   | rRNA 2'-O-methyltransferase fibrillar         | 575,98    | 19       | 16        | 50,8        | 33    |
| YHL033C  | RPL8A  | B5VJP5 | B5VJP5_YEAS6 | 28151,4 | YHL033Cp-like protein                         | 400,48    | 17       | 17        | 48,4        | 30    |
| YPL090C  | RPS6   | P02365 | RS6_YEAST    | 27036,9 | 40S ribosomal protein S6                      | 292,12    | 16       | 16        | 55,5        | 20    |
| YFR031CA | RPL22A | P05736 | RL2_YEAST    | 27391,9 | 60S ribosomal protein L2                      | 299,54    | 13       | 13        | 54,7        | 22    |
| YOR310C  | NOP58  | A6ZPE5 | NOP58_YEAS7  | 56978,3 | Nucleolar protein 58                          | 690,82    | 13       | 13        | 32,7        | 21    |
| YIL133C  | RPL16A | B3LM30 | B3LM30_YEAS1 | 22493,5 | 60S ribosomal protein L13(Fragment)           | 305,72    | 12       | 12        | 55,3        | 17    |
| YGR159C  | NSR1   | P27476 | NSR1_YEAST   | 44565,9 | Nuclear localization sequence binding protein | 403,13    | 12       | 12        | 35          | 20    |
| YPL131W  | RPL5   | B3LKU4 | B3LKU4_YEAS1 | 33751,2 | Ribosomal protein L5                          | 357,03    | 11       | 11        | 44,1        | 20    |
| YKL006W  | RPL14A | P36105 | RL14A_YEAST  | 15214,6 | 60S L14-A                                     | 314,82    | 10       | 10        | 55,8        | 14    |
| YDL191W  | RPL35A | P39741 | RL35_YEAST   | 13958   | 60S L35                                       | 257,09    | 10       | 10        | 52,5        | 13    |
| YGR123W  | RPS2   | P25443 | RS2_YEAST    | 27490   | 40S ribosomal protein S2                      | 259,84    | 10       | 10        | 42,9        | 19    |
| YOR204W  | DED1   | A6ZP47 | DED1_YEAS7   | 65740,5 | ATP-dependent RNA helicase DED1               | 385,65    | 10       | 10        | 24          | 16    |
| YJL177W  | RPL17B | P46990 | RL17B_YEAST  | 20539   | 60S ribosomal protein L17-B                   | 370,75    | 9        | 9         | 54,3        | 19    |
| YNL299W  | TRF5   | P48561 | TRF5_YEAST   | 74179   | Poly(A) RNA polymerase protein 1              | 217,65    | 9        | 9         | 15,9        | 12    |
| YGR118W  | RPS23  | P32827 | RS23_YEAST   | 16141,9 | 40S S23                                       | 126,68    | 8        | 8         | 56,6        | 9     |
| YIL069C  | RPS24  | P26782 | RS24_YEAST   | 15319,5 | 40S S24                                       | 146,01    | 8        | 8         | 48,1        | 9     |
| YBL087C  | RPL23A | P04451 | RL23_YEAST   | 14577,7 | 60S L23                                       | 280,77    | 8        | 5         | 42,3        | 14    |
| YHR010W  | RPL27A | P0C2H6 | RL27A_YEAST  | 15521,7 | 60S L27-A                                     | 245,2     | 7        | 7         | 47,1        | 14    |
| YGR148C  | RPL24B | A6ZUG0 | A6ZUG0_YEAS7 | 17566,9 | Ribosomal protein L24B                        | 135,85    | 7        | 7         | 32,3        | 11    |
| YHR064C  | SSZ1   | P38788 | SSZ1_YEAST   | 58316,2 | Ribosome-associated complex subunit SSZ1      | 301,46    | 7        | 7         | 21,7        | 12    |
| YER131W  | RPS26B | P39939 | RS26B_YEAST  | 13666,4 | 40S S26-B                                     | 176,45    | 6        | 6         | 48,7        | 13    |
| YLR061W  | RPL22A | P05749 | RL22A_YEAST  | 13685   | 60S L22-A                                     | 476,13    | 5        | 5         | 67,8        | 11    |
| YJR094W  | RPL43A | B3LLA2 | B3LLA2_YEAS1 | 10394,5 | Ribosomal L43A                                | 235,78    | 5        | 5         | 51,1        | 7     |
| YPL249CA | RPL36B | Q14455 | RL36B_YEAST  | 11128,3 | 60S L36-B                                     | 85,72     | 5        | 5         | 43          | 6     |
| YCL037C  | SRO9   | B3LU45 | B3LU45_YEAS1 | 48090,8 | Protein SRO9                                  | 133,3     | 3        | 3         | 11,3        | 5     |
| YGR128C  | UTP8   | B3LIA0 | B3LIA0_YEAS1 | 80692,3 | U3 small nucleolar RNA-associated protein 8   | 136,93    | 3        | 3         | 5,5         | 4     |
| YOR369C  | RPS12  | P48589 | RS12_YEAST   | 15462,2 | 40S S12                                       | 62,53     | 2        | 2         | 18,9        | 3     |
| YLR167W  | RPS31  | B3RH62 | B3RH62_YEAS1 | 17433,4 | Also encodes a ubiquitin protein              | 51,43     | 2        | 2         | 17,1        | 3     |
| YOR293W  | RPS10A | B5VSH1 | B5VSH1_YEAS6 | 18041,3 | YOR293Wp-like protein                         | 44,32     | 2        | 2         | 16          | 2     |
| YEL026W  | SNU13  | P39990 | SNU13_YEAST  | 13731,4 | 13 kDa ribonucleoprotein-associated protein   | 45,8      | 2        | 2         | 14,3        | 3     |
| YHR089C  | GAR1   | P28007 | GAR1_YEAST   | 21638,1 | H/ACA ribonucleoprotein complex subunit 1     | 109,75    | 2        | 2         | 14,1        | 4     |
| YPL093W  | NOG1   | Q02892 | NOG1_YEAST   | 74762,5 | Nucleolar GTP-binding protein 1               | 112,61    | 1        | 1         | 2,8         | 3     |
| YGR185C  | TYS1   | P36421 | SYYC_YEAST   | 44220,2 | Tyrosyl-tRNA synthetase, cytoplasmic          | 49,1      | 1        | 1         | 2,8         | 1     |
| YGR121W  | ATP2   | P00830 | ATPB_YEAST   | 54817   | ATP synthase subunit beta, mitochondrial      | 58,46     | 1        | 1         | 2,7         | 1     |

Choque et al., Figure S1

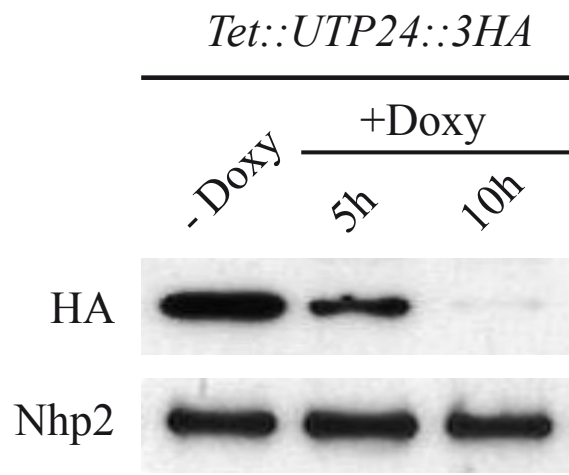

Choque et al., Figure S2

A.

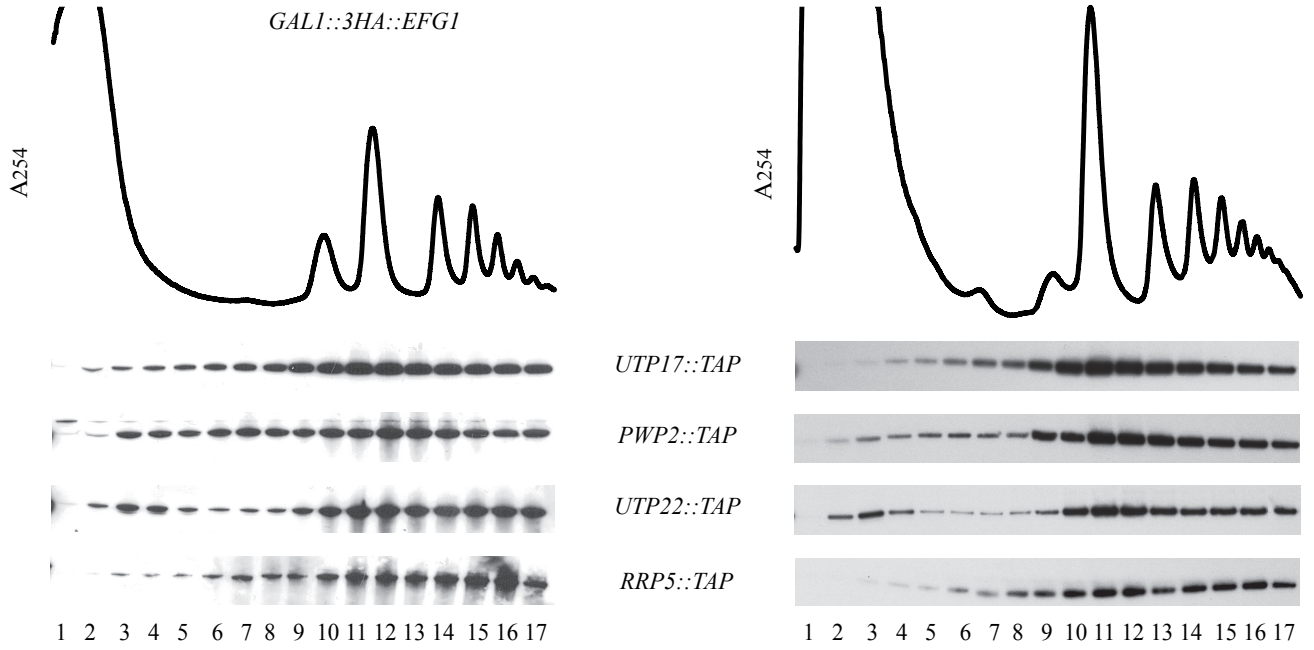

B.

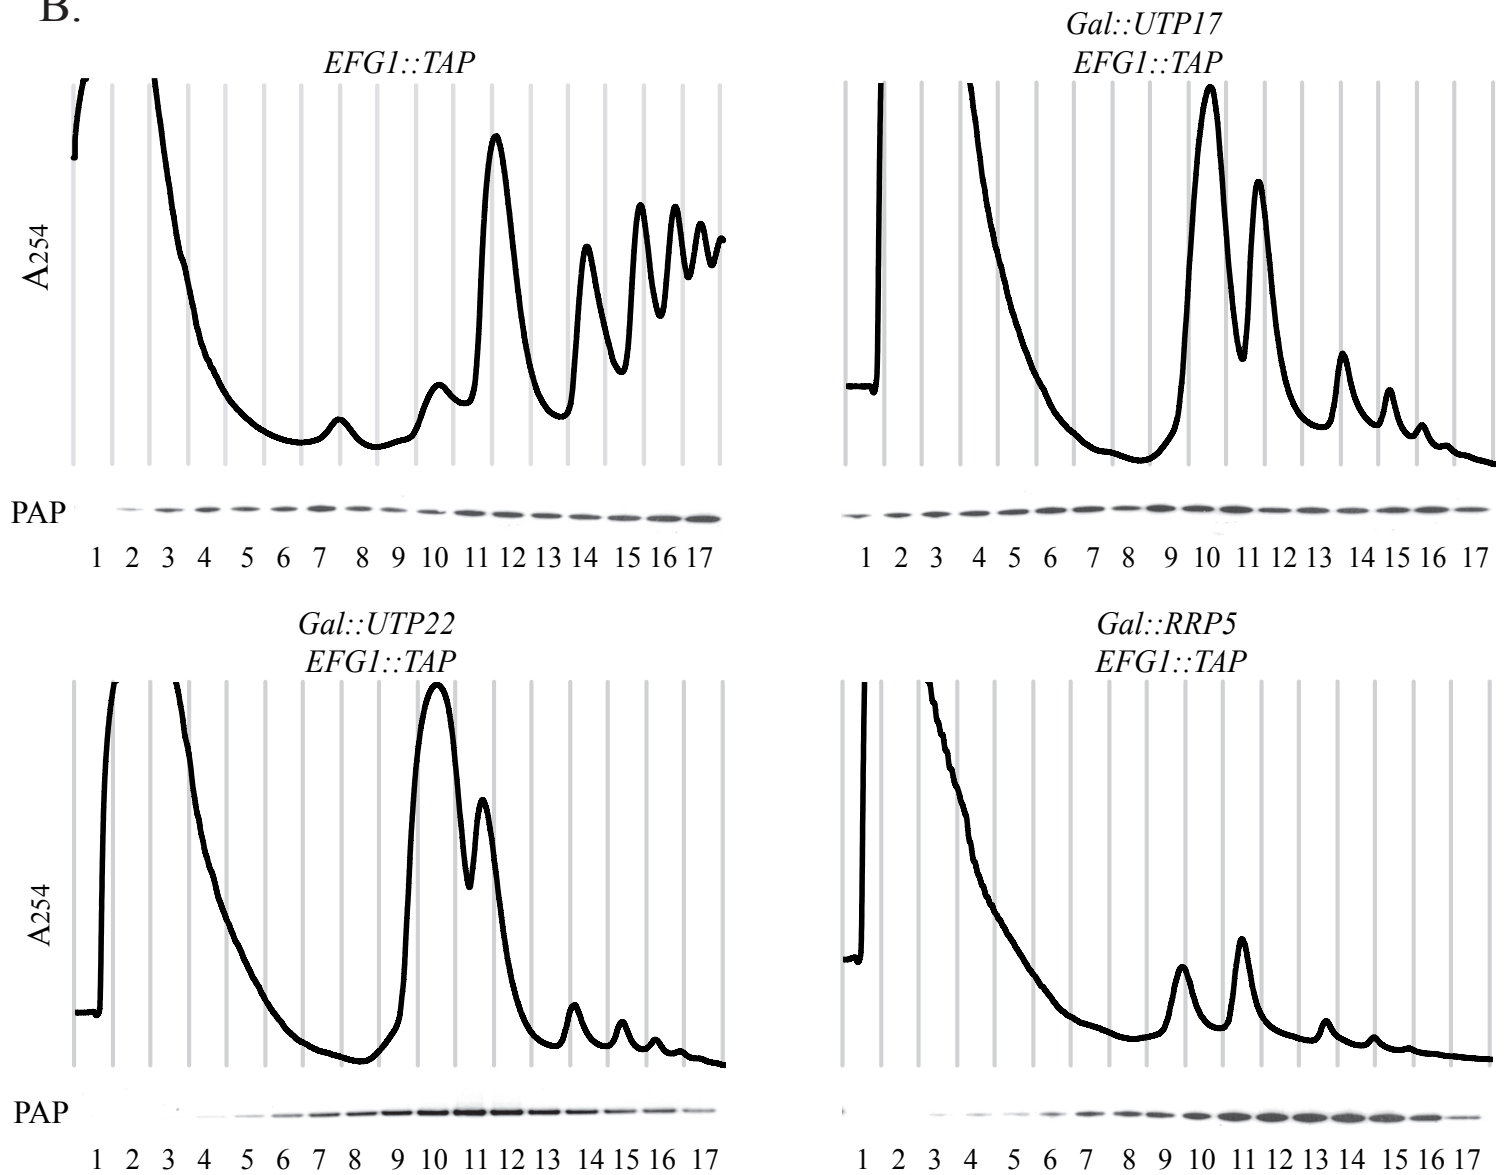

### Figure S1:

Efg1-TAP was affinity purified under native conditions as described in (32). As a control, the parental WT strain, devoid of TAP-tagged protein, was handled similarly. Purified samples were separated by SDS-polyacrylamide gel electrophoresis and stained with coomassie protein staining solution. Bands were excised and polypeptides contained in these bands were subjected to in-gel trypsin digestion. The resulting peptides were analyzed by Mass Spectrometry as described in Materials and Methods. A non-exhaustive list of peptides found in the analysis is presented in this table.

### Figure S2: Western-blot analysis of Utp24-3HA depletion

*TET::UTP24-3HA* strains were grown in YPD media and YPD media containing doxycycline (40µg/ml). Total proteins were extracted at the times indicated and analyzed by Western blot. Utp24-3HA and Nhp2 were detected using anti-HA and Nhp2-specific antibodies respectively.

### Figure S3: Efg1 and U3 processome assembly.

**(A)** Depletion of Efg1 in yeast does not affect the incorporation of components of the UTP-A, UTP-B, or UTP-C modules within preribosomes. Strains expressing TAP-tagged versions of Utp17p, Pwp2p, Utp22p or Rrp5p that were otherwise WT (right panel) or expressing 3HA-Efg1 under the control of the *GAL1* promoter (left panel) were transferred from galactose- to glucose-based medium and grown for 3 h. Total extracts prepared from these cells were sedimented through sucrose gradients. Western blot experiments were carried out using rabbit PAP to detect TAP-tagged proteins in the different fractions. **(B)** Sedimentation profile of Efg1-TAP in WT cells (upper left panel) or in cells lacking Utp17p, Pwp2p, or Rrp5p. The *GAL1::UTP17*, *GAL1::UTP22*, and *GAL1::RRP5* strains expressing Efg1-TAP were shifted from galactose- to glucose-containing medium and grown for 3 h, to deplete the corresponding proteins. As a control, the *EFG1::TAP* strain grown in the presence of glucose was used. Total extracts prepared from these cell samples were sedimented through sucrose gradients. The proteins contained in each fraction were analyzed by Western blotting using PAP antibodies to detect Efg1-TAP.
